# Supplementary material for: Leveraging electronic health records and knowledge networks for Alzheimer’s disease prediction and sex-specific biological insights
Source: PubMed Central journal article supplement (PMC10950787; doi:10.1038/s43587-024-00573-8), 2024-02-21
Supplement: 43587_2024_573_MOESM1_ESM.pdf [file 43587_2024_573_MOESM1_ESM.pdf]

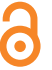

---

# Leveraging electronic health records and knowledge networks for Alzheimer's disease prediction and sex-specific biological insights

---

In the format provided by the authors and unedited

**Supplemental Table 1:** Control exclusion codes.

List of mappings from ICD-10 codes G[123]\* to OMOP codes for determining exclusion of Controls. The mapping was generated and manually reviewed to white-list certain codes and approve exclusion of dementia-related codes.

**Supplemental Table 2:** Dementia codes.

List of mappings from Dementia/FTD related condition concepts to SNOMED OMOP mappings and N06D ATC code to RxNorm OMOP mappings for identifying index time 0 for AD patients.

**Supplemental Table 3:** Matching results for time point models on matched cohorts

Demographics of matched cohorts (propensity-score matched by demographics and visit-related factors, see Methods) on the training set for matched cohort models.

**Supplemental Table 4:** Male and female demographics and matching result

Demographics of male and female cohorts (combined train and test set). The same patients for train/test set split in the general model are utilized for the sex-stratified models. Matched cohorts on the sex-strata training sets are also shown for the sex-specific matched cohort models.

**Supplemental Table 5:** Matched cohort trained model comparison between logistic regression and random forest

Mean and standard deviations AUROC was computed for bootstrapped samples of the held-out evaluation set for both the random forest and logistic regression models for comparability.

| <b>Model Time</b> | <b>Bootstrapped mean AUROC</b> | <b>Bootstrapped std AUROC</b> | <b>Model Type</b>   | <b>Features</b> |
|-------------------|--------------------------------|-------------------------------|---------------------|-----------------|
| -1 day            | 0.771667                       | 0.139762                      | random forest       | clinical        |
| -1 yr             | 0.738797                       | 0.16183                       | random forest       | clinical        |
| -1 day            | 0.70313                        | 0.20803                       | logistic regression | clinical        |
| -3 yr             | 0.695912                       | 0.183331                      | random forest       | clinical        |
| -1 yr             | 0.674981                       | 0.189248                      | logistic regression | clinical        |
| -3 yr             | 0.637145                       | 0.187386                      | logistic regression | clinical        |
| -5 yr             | 0.598022                       | 0.207104                      | random forest       | clinical        |
| -5 yr             | 0.589743                       | 0.197771                      | logistic regression | clinical        |
| -7 yr             | 0.583837                       | 0.206874                      | random forest       | clinical        |
| -7 yr             | 0.549061                       | 0.192763                      | logistic regression | clinical        |

  

| <b>Model Time</b> | <b>Bootstrapped mean AUROC</b> | <b>Bootstrapped std AUROC</b> | <b>Model Type</b>   | <b>Features</b>        |
|-------------------|--------------------------------|-------------------------------|---------------------|------------------------|
| -1 day            | 0.738133                       | 0.170242                      | random forest       | clinical + demo/visits |
| -1 day            | 0.728514                       | 0.182411                      | logistic regression | clinical + demo/visits |
| -1 yr             | 0.710432                       | 0.183543                      | random forest       | clinical + demo/visits |
| -3 yr             | 0.700636                       | 0.175239                      | random forest       | clinical + demo/visits |
| -1 yr             | 0.663312                       | 0.187115                      | logistic regression | clinical + demo/visits |
| -3 yr             | 0.657146                       | 0.198652                      | logistic regression | clinical + demo/visits |
| -5 yr             | 0.619819                       | 0.201044                      | logistic regression | clinical + demo/visits |
| -7 yr             | 0.60619                        | 0.181737                      | random forest       | clinical + demo/visits |
| -5 yr             | 0.599069                       | 0.199292                      | random forest       | clinical + demo/visits |
| -7 yr             | 0.59507                        | 0.199938                      | logistic regression | clinical + demo/visits |

**Supplemental Table 6: Balanced accuracy performance of models**

Balanced accuracy (defined as average recall for both the positive and negative class) performance on the held-out evaluation set for both the full model and the matched cohort trained model.

| <b>Model Time</b> | <b>Full or matched cohort model</b> | <b>Held-out evaluation set balanced accuracy</b> | <b>Features</b> |
|-------------------|-------------------------------------|--------------------------------------------------|-----------------|
| -7 yr             | full                                | 0.66333567                                       | clinical        |
| -5 yr             | full                                | 0.68713887                                       | clinical        |
| -3 yr             | full                                | 0.70504803                                       | clinical        |
| -1 yr             | full                                | 0.72020014                                       | clinical        |
| -1 day            | full                                | 0.73342356                                       | clinical        |
| -7 yr             | matched                             | 0.56751959                                       | clinical        |
| -5 yr             | matched                             | 0.59464602                                       | clinical        |
| -3 yr             | matched                             | 0.64351437                                       | clinical        |
| -1 yr             | matched                             | 0.65277962                                       | clinical        |
| -1 day            | matched                             | 0.67079665                                       | clinical        |

  

| <b>Model Time</b> | <b>Full or matched cohort model</b> | <b>Held-out evaluation set balanced accuracy</b> | <b>Features</b>        |
|-------------------|-------------------------------------|--------------------------------------------------|------------------------|
| -7 yr             | full                                | 0.79420735                                       | clinical + demo/visits |
| -5 yr             | full                                | 0.79553055                                       | clinical + demo/visits |
| -3 yr             | full                                | 0.80227966                                       | clinical + demo/visits |
| -1 yr             | full                                | 0.79940679                                       | clinical + demo/visits |
| -1 day            | full                                | 0.81155760                                       | clinical + demo/visits |
| -7 yr             | matched                             | 0.56836172                                       | clinical + demo/visits |
| -5 yr             | matched                             | 0.58730455                                       | clinical + demo/visits |
| -3 yr             | matched                             | 0.64186021                                       | clinical + demo/visits |
| -1 yr             | matched                             | 0.65705140                                       | clinical + demo/visits |
| -1 day            | matched                             | 0.67644997                                       | clinical + demo/visits |

**Supplemental Table 7: UCDDP AD patient concepts and demographics**

Top table shows the specific concepts utilized to identify Alzheimer’s Disease as the outcome in the UCDDP database, with breakdown by number of patients per concept. Due to deidentification, only a patient’s birth year is known for age estimation.

| <b>Term</b>                                                          | <b># patients</b> |
|----------------------------------------------------------------------|-------------------|
| Alzheimer's disease                                                  | 20562             |
| Primary degenerative dementia of the Alzheimer type, senile onset    | 9327              |
| Primary degenerative dementia of the Alzheimer type, presenile onset | 2530              |

|                                 |                               | <b>Overall</b> |
|---------------------------------|-------------------------------|----------------|
| <b>n</b>                        |                               | 24389          |
| <b>estimated_age, mean (SD)</b> |                               | 45.6 (23.5)    |
| <b>gender, n (%)</b>            | <b>FEMALE</b>                 | 12915 (53.0)   |
|                                 | <b>MALE</b>                   | 11391 (46.7)   |
|                                 | <b>UNKNOWN</b>                | 83 (0.3)       |
| <b>race, n (%)</b>              | <b>Native</b>                 | 78 (0.3)       |
|                                 | <b>Asian</b>                  | 2069 (8.5)     |
|                                 | <b>Black</b>                  | 1079 (4.4)     |
|                                 | <b>Multirace</b>              | 494 (2.0)      |
|                                 | <b>NHPI</b>                   | 108 (0.4)      |
|                                 | <b>Other Race</b>             | 3413 (14.0)    |
|                                 | <b>Unknown</b>                | 6535 (26.8)    |
|                                 | <b>White</b>                  | 10613 (43.5)   |
| <b>ethnicity, n (%)</b>         | <b>Hispanic or Latino</b>     | 3815 (15.6)    |
|                                 | <b>Not Hispanic or Latino</b> | 13869 (56.9)   |
|                                 | <b>Unknown</b>                | 6705 (27.5)    |
| <b># visits, mean (SD)</b>      | missing = 3092                | 21.1 (51.8)    |

**Supplemental Table 8: Hyperlipidemia UCDDP concepts and demographics**

Top table shows the specific concepts utilized to identify HLD as the exposure in the UCDDP database, with breakdown by number of patients per concept. Due to deidentification, only a patient's birth year is known for age estimation. Recruitment age is utilized as the starting age for survival analysis, with HLD group as the age of HLD diagnosis, and unexposed group as the age of first EHR visit.

| Term                 | # patients |
|----------------------|------------|
| Hyperlipidemia       | 702142     |
| Mixed hyperlipidemia | 169316     |

|                                   |                   | Overall       | No HLD        | HLD           | SMD   |
|-----------------------------------|-------------------|---------------|---------------|---------------|-------|
| <b>n</b>                          |                   | 728578        | 364289        | 364289        |       |
| <b>gender, n (%)</b>              | <b>FEMALE</b>     | 371050 (50.9) | 186259 (51.1) | 184791 (50.7) | 0.037 |
|                                   | <b>MALE</b>       | 357255 (49.0) | 177768 (48.8) | 179487 (49.3) |       |
|                                   | <b>UNKNOWN</b>    | 273 (0.0)     | 262 (0.1)     | 11 (0.0)      |       |
| <b>race, n (%)</b>                | <b>Native</b>     | 3278 (0.4)    | 1762 (0.5)    | 1516 (0.4)    | 0.113 |
|                                   | <b>Asian</b>      | 69432 (9.5)   | 32466 (8.9)   | 36966 (10.1)  |       |
|                                   | <b>Black</b>      | 35072 (4.8)   | 16512 (4.5)   | 18560 (5.1)   |       |
|                                   | <b>Multirace</b>  | 17486 (2.4)   | 7635 (2.1)    | 9851 (2.7)    |       |
|                                   | <b>NHPI</b>       | 2972 (0.4)    | 1270 (0.3)    | 1702 (0.5)    |       |
|                                   | <b>Other Race</b> | 81646 (11.2)  | 44093 (12.1)  | 37553 (10.3)  |       |
|                                   | <b>Unknown</b>    | 81062 (11.1)  | 44889 (12.3)  | 36173 (9.9)   |       |
|                                   | <b>White</b>      | 437630 (60.1) | 215662 (59.2) | 221968 (60.9) |       |
| <b>ethnicity, n (%)</b>           | <b>H/L</b>        | 102163 (14.0) | 53581 (14.7)  | 48582 (13.3)  | 0.126 |
|                                   | <b>Not H/L</b>    | 560067 (76.9) | 271574 (74.5) | 288493 (79.2) |       |
|                                   | <b>Unknown</b>    | 66348 (9.1)   | 39134 (10.7)  | 27214 (7.5)   |       |
| <b>estimated_age, mean (SD)</b>   |                   | 69.7 (10.8)   | 69.6 (11.0)   | 69.8 (10.7)   | 0.012 |
| <b>recruitment_age, mean (SD)</b> |                   | 63.9 (10.5)   | 63.4 (10.5)   | 64.3 (10.5)   | 0.087 |

**Supplemental Table 9: Osteoporosis UCDDP concepts and demographics**

Top table shows the specific concepts utilized to identify osteoporosis as the exposure in the UCDDP database with inclusion of children concepts, and breakdown by number of patients per concept. Due to deidentification, only a patient's birth year is known for age estimation.

Recruitment age is utilized as the starting age for survival analysis, with osteoporosis group as the age of osteoporosis diagnosis, and unexposed group as the age of first EHR visit.

| Term                              | # patients |
|-----------------------------------|------------|
| Osteoporosis                      | 145608     |
| Senile osteoporosis               | 30611      |
| Osteoporotic fracture             | 7772       |
| Osteoporotic fracture of vertebra | 3987       |
| Localized osteoporosis - Lequesne | 3126       |
| Osteoporotic fracture of femur    | 2971       |
| Idiopathic osteoporosis           | 1231       |
| Disuse osteoporosis               | 309        |
| Osteoporotic fracture of humerus  | 186        |
| Osteoporotic fracture of hand     | 39         |

|                                   |                   | Overall       | No osteo     | osteo        | SMD    |
|-----------------------------------|-------------------|---------------|--------------|--------------|--------|
| <b>n</b>                          |                   | 137880        | 68940        | 68940        |        |
| <b>gender, n (%)</b>              | <b>FEMALE</b>     | 119637 (86.8) | 60386 (87.6) | 59251 (85.9) | 0.049  |
|                                   | <b>MALE</b>       | 18241 (13.2)  | 8554 (12.4)  | 9687 (14.1)  |        |
|                                   | <b>UNKNOWN</b>    | 2 (0.0)       |              | 2 (0.0)      |        |
| <b>race, n (%)</b>                | <b>Native</b>     | 496 (0.4)     | 272 (0.4)    | 224 (0.3)    | 0.134  |
|                                   | <b>Asian</b>      | 15784 (11.4)  | 7364 (10.7)  | 8420 (12.2)  |        |
|                                   | <b>Black</b>      | 4611 (3.3)    | 2546 (3.7)   | 2065 (3.0)   |        |
|                                   | <b>Multirace</b>  | 3564 (2.6)    | 1737 (2.5)   | 1827 (2.7)   |        |
|                                   | <b>NHPI</b>       | 419 (0.3)     | 198 (0.3)    | 221 (0.3)    |        |
|                                   | <b>Other Race</b> | 13032 (9.5)   | 7427 (10.8)  | 5605 (8.1)   |        |
|                                   | <b>Unknown</b>    | 13670 (9.9)   | 7552 (11.0)  | 6118 (8.9)   |        |
|                                   | <b>White</b>      | 86304 (62.6)  | 41844 (60.7) | 44460 (64.5) |        |
| <b>ethnicity, n (%)</b>           | <b>H/L</b>        | 15530 (11.3)  | 8509 (12.3)  | 7021 (10.2)  | 0.133  |
|                                   | <b>Not H/L</b>    | 112474 (81.6) | 54548 (79.1) | 57926 (84.0) |        |
|                                   | <b>Unknown</b>    | 9876 (7.2)    | 5883 (8.5)   | 3993 (5.8)   |        |
| <b>estimated_age, mean (SD)</b>   |                   | 74.8 (9.2)    | 75.2 (9.1)   | 74.5 (9.3)   | -0.074 |
| <b>recruitment_age, mean (SD)</b> |                   | 68.7 (8.9)    | 68.2 (8.7)   | 69.2 (9.1)   | 0.12   |
